## Title Page

Title: Functional Diversification of Tripeptidylpeptidase and Endopeptidase Sedolisins in Fungi

Authors: Facundo Orts and Arjen ten Have\*

Instituto de Investigaciones Biológicas (IIB-CONICET-UNMdP), Facultad de Ciencias Exactas y

5 Naturales, Universidad Nacional de Mar del Plata, CC 1245, 7600 Mar del Plata, Argentina.

[Facundoorts@gmail.com](mailto:Facundoorts@gmail.com); [tenhavearjen@gmail.com](mailto:tenhavearjen@gmail.com)

\*Corresponding author

## Abstract (250 max)

10 Sedolisin are acid proteases that are related with the basic subtilisins. They have been identified in all three superkingdoms but are not ubiquitous, although fungi that secrete acids as part of their lifestyle can have up to six paralogs. Both tripeptidylpeptidase (TPP) and endopeptidase activity have been identified and it has been suggested that these correspond to separate subfamilies.

We studied eukaryotic sedolisin by computational analysis. A maximum likelihood tree  
15 shows three major clades of which two contain only fungal sequences. One fungal clade contains all known TPPs whereas the other contains the endosedolisin. We identified four cluster specific inserts (CSIs) in endosedolisin, of which CSIs 1, 3 and 4 appear as solvent exposed according to structure modeling. Part of CSI2 is exposed but a short stretch forms a novel and partially buried  $\alpha$ -helix that induces a conformational change near the binding pocket. We also identified a total of 13  
20 specificity determining positions (SDPs) that are divided over three SDP sub-networks. The major SDP network contains eight SDPs and modeling of virtual mutants suggests a key role for the W307A or F307A substitution. This is accompanied by a group of four SDPs that physically interact at the interface of the catalytic domain and the enzyme's prosegment. Modeling of virtual mutants suggests these SDPs are indeed required to compensate the conformational change induced by CSI2  
25 and the A307. The additional small SDP networks appear to be linked to the major network all together explaining the hypothesizes functional diversification of fungal sedolisin.

## Highlights

There are two sedolisin subfamilies in fungi: tripeptidyl peptidases and endopeptidases

Functional Diversification of fungal sedolisin led to a conformational change in the pocket

30 Functional Diversification centers around buried SDP307

SDP307 is aromatic in TPPs and Alanine in endosedolisin

Additional SDPs affect the interaction between core and chaperone-like prosegment

# 1 Introduction

## 1.1 Proteases are ubiquitous enzymes that can be classified in many ways.

35 Proteases or peptidases degrade proteins by hydrolysis of peptide bonds. They are involved in various biological processes as cell death[1], nutrition[2] and infections[3]. Proteases are classified, primarily based on the catalytic mechanism, into several classes among which aspartic, cystein, metallo and serine proteases. These main classes are further hierarchically organized into clans and families based on homology[4]. Proteases can also be classified based on other characteristics. A  
40 major difference can be made between endo- and exopeptidases, where the latter include di- and tripeptidyl peptidases. Among exopeptidases one can discriminate carboxy- and aminopeptidases.

## 1.2 Sedolisins are acid proteases related with the basic subtilisins.

Perhaps the most common proteases are serine proteases in which a serine serves as the nucleophylic amino acid in the catalytic site. The catalytic site is most often formed by a triade  
45 which can differ among the different superfamilies. Currently 12 clans or superfamilies with 29 families have been assigned by MEROPS[5]. One of the most important clans is the SB clan that contains the ubiquitous subtilisins, which include the kexins (S8)[6], and the rather rare sedolisins (S53, for review see [7]). Where the basic subtilisins have a triade that consists of, besides the Serine, a Histidine and an Aspartate, the acid sedolisins have a Glutamate replacing the the  
50 Histidine[8]. Despite the different triade and consequently a large difference in optimal activity pH, there is ample evidence the two subfamilies form a superfamily. In 2001 the first structure of a sedolisin, endosedolisin PSCP from *Pseudomonas* sp. 101, complexed with inhibitor iodotyrostatin, was resolved (PDB code 1GA4)[9], shortly followed by a structure from kumamolysin from *Bacillus* sp. MN-32 (PDB codes 1T1E for precursor and 1GT9 for mature peptidase). Although  
55 sequence similarity between sedolisins and subtilisins is low, structural alignments clearly indicate they are homologous[10] since they have similar folds. Catalytic residues as well as the oxyanion Aspartate appear as homologous. Sedolisins also have a Calcium binding site albeit at a different position than subtilisins[10].

The best studied sedolisin is Human lysosomal CLN2 since mutant forms are involved in the  
60 fatal classical late-infantile neuronal ceroid lipofuscinosis or Batten disease. The structure (PDB  
codes 3EDY for precursor and 3EE6 for mature peptidase) of this tripeptidyl aminopeptidase has  
been determined and a number of publications describe the effect of many mutations  
found[11][12,13]. Of particular interest is W542 which has been shown to be required for activity.  
The W542L mutant was shown to be retained in the ER which suggests misfolding[14]. In addition,  
65 W290L and W307L showed largely reduced activities.

### 1.3 Sedolisins have a large prosegment that appears to have various functions.

The processing of subtilisins and sedolisins is also similar. Both have a large and similar  
prosegment that appears to be able to form an independent domain that seems to be involved in  
correct folding of the core or the catalytic domain[15][16]. The prosegment and catalytic domain  
70 are separated by a short propeptide or linker that is removed during isozyme activation at low pH.  
In general it has been shown that prosegments act in assisting in refolding as well as targeting (for  
review see [17]). For Human TPP it has been shown that prosegment and catalytic domain have  
multiple molecular interactions including salt bridges and hydrogen bonds, covering 15% of the  
solvent accessible surface of the catalytic domain[18]. It has been shown that the prosegment of  
75 Human TPP also functions as inhibitor. Secretome analysis of for instance *B. cinerea* has shown  
certain paralogs consist of the core part of the enzyme only[19].

### 1.4 Fungal Sedolisins can have endo- or tripeptidyl-peptidase activity

Other characterized eukaryotic sedolisins are of fungal origin. Scytalidolisin[20], Grifolisin[21] and  
Aorsin were the first fungal enzymes characterized as sedolisin. More recently, four paralogs from  
80 *Aspergillus fumigatus* were characterized. SED\_A was, similarly to Aorsin from *Aspergillus oryzae*,  
characterized as an endosedolisin, whereas SED\_B, SED\_C and SED\_D were shown to have TPP  
activity[22]. The authors suggested furthermore endosedolisins cluster in a different clade than  
TPPs, suggesting that gene duplication has resulted in functional diversification. A recent genome  
paper of fungal plant pathogens *Botrytis cinerea* and *Sclerotinia sclerotiorum* showed that acid



85 secreting fungi as *B. cinerea*, *S. sclerotiorum* but also the *Aspergilli* show relatively few subtilisins and many sedolisins, as compared to non-acid secreting fungi such as *Giberella zeae*[23]. This also suggests functional diversification has occurred. Here we study the functional redundancy and diversification of fungal sedolisins by computational analysis. We reconstructed a phylogenetic tree that, together with the underlying multiple sequence alignment (MSA), was used for the  
90 identification of cluster specific inserts (CSIs) and specificity determining positions (SDPs), which form the sequence characteristics that can explain functional diversifications. Modeling of wild type and mutant sequences was performed in order to show how functional diversification into endosedolisins and TPP has likely occurred, demonstrating important roles for part of CSI2 and the position homologous to Human TPPs W307.

95

## 2 Materials y methods

### 2.1 Sedolisin sequence identification.

The MEROPS[5] holozyme sequences from the MEROPS database were used to build a first HMMER[24] profile that was used to search a total of 343 complete proteomes as well as the PDB  
100 and SwissProt databases. The obtained sequences were scrutinized using MEROPS batch blast[25] which includes a scrutiny for the presence of catalytic site and oxyanion residues. Confirmed sedolisin sequences were aligned and the resulting MSA was used for a second HMMER screening. This process was iterated until convergence.

### 2.2 MSA and Phylogeny

105 MSAs were constructed using MAFFT's[26] iterative refinement method and represented using Endscript[27][28]. The final alignment was manually corrected using as criteria that secondary structure elements (taking as reference 3EE6) should be represented by each sequence combined with entropy minimization. The MSA was trimmed using BMGE[29] (-g 0.3 and h 0.8) which resulted in a trimmed MSA that maintains, among others, over 90% of columns corresponding to  
110 secondary structure elements. Maximum likelihood phylogeny was constructed using

PHYML3.1[30] using the WAG model of amino acid substitution using a discrete gamma model of 4 categories and a shape parameter of 1.4, as determined by prior ProtTest[31] analysis. Statistical support was determined by PHYML's aLRT as well as bootstrapping (n = 1024) using the resources available at <https://www.e-biothon.fr>. The major graphical representations were made using Dendroscope[32]. The presentations showing the CSIs were made using iTOL[33].

### 2.3 Identification of Specificity Determining Positions (SDPs).

We identified CDPs using SDPfox[34]. MISTIC[35] was used to determine levels of mutual information (MI) between positions or columns of the MSA. SDPs are then defined as CDPs with at least two direct connections with other CDPs, using MISTIC's default z-score cut-off of 6.5. CDPs that only connect to a single other CDPs were considered putative SDPs. Cytoscape[36] was used to identify and draw networks of directly connected SDPs. Sequence Logo's were made using Weblogo[37].

### 2.4 Structure analysis

3D structures of sedolisins were obtained from the Protein Data Bank[38]. 3EE6[18], corresponding to mature Human TPP was used as a standard. Models were made using I-Tasser[39] using either default settings or using 3EE6 as the reference model. Binding pockets were predicted using Coach[40]. Visualization was performed using VMD which included structural alignment using the STAMP[41] extension. The pocket predictions for 3EE6 and the SED\_A and SED\_B models were performed with the software Fpocket[42] using the default parameters.

## **3 Results**

### 3.1 Datamining, Multiple Sequence Alignment and Phylogeny

In order to perform structure-function prediction of eukaryote sedolisins we set out to obtain a representative collection of sequences. A database containing the complete proteomes of 56 fungi and 186 non fungal eukaryotes (Listed in S\_Datafile2.xls) complemented with the PDB and Swissprot database was subjected to iterative HMMER profiling yielding 230 sequences of

sedolisin homologs. Upon hallmark and structural scrutiny a total of 204 sequences were considered as high fidelity, as required for the identification of specificity determining positions. Sequences were aligned and an excerpt of the final MSA is shown in Fig. 1. In general, eukaryotic sedolisins are largely conserved, including the prosegment part. Interestingly, of the three disulfide bridges identified in the resolved structure 3EE6, only the second appears to be conserved among eukaryotes. A trimmed MSA, lacking low quality subalignments, was used to reconstruct a maximum likelihood tree.

**Fig. 1. Excerpt of Eukaryotic Sedolisin Sequence Alignment.**

*The demonstrated sequences are representatives of the three major phylogenetic clusters, as indicated by the tree placed at the end of the alignment, extracted from the complete MSA (S\_Datafile1). 3EE6, ngr5053 and sal1152 are non-fungal sequences; SED\_A and Aorsin are fungal endosedolisins; SED\_B and SED\_C are fungal TPPs. Oma1582 and Asa2533 are additional fungal sequences with unknown characteristics. Horizontal arrows and helices indicate sheet and helix regions, respectively. Nomenclature and numbers according to 3EE6. The vertical arrows represent beginning and end of the peptide linker. Sequence in gray box represents the SED\_A inserts (numbers according to SED\_A sequence): CSI1 (190-217), CSI2 (345-370), CSI3 (427-435) and CSI4 (513-524). Black stars indicate catalytic residues E, D, and S whereas the gray star indicates the oxyanion D. Connected boxes, numbered I to III, indicate disulfide bridges identified in the 3EE6 structure. F1 points to two cysteines strictly conserved among all fungal sedolisins but absent in non-fungal sedolisins.*

The tree (Fig. 2A) shows three major clades of which two contain only fungal sequences and one contains only non-fungal sequences. Inside the non-fungal clade, vertebrate sedolisins appear in a single subclade that on its turn consists of a mammalian and Aptinopterygii subclade. The mammalian subclade contains human TPP for which a crystal structure has been resolved (3EE6 in

PDB). The apparent random taxonomic distribution of the fungal sequences over the two well separated clades indicates the bifurcation is caused by a functional diversification. In correspondence with Reichard and coworkers[22], one of the fungal clades contains SED\_A from *A. fumigatus* and Aorsin[43] from *A. oryzae* that have both been characterized as endopeptidases . The other fungal clade contains SED\_B, SED\_C and SED\_D from *A. fumigatus*, all characterized as TPPs[22]. Although not supported by a lot of biochemical evidence the above mentioned data suggest sequence diversification has resulted into endo and TPP sedolisins, hence for the remainder of the manuscript we will refer to the sequences and clades as Hypo-endosedolisin and Hypo-TPP. Both endo and TPP activity has been shown for non-fungal sedolisins, hence, as such we have no indication regarding the state of the ancestral enzyme. In addition, at least Human TPP has been shown to have endo activity at low pH[44].

## Fig. 2. Phylogenetic Clustering and Cluster Specific Inserts of Eukaryotic sedolisins

(A) Phylogenetic trees of eukaryotic sedolisins. The large circular cladogram shows the major clades of non-fungal sequences (blue); fungal hypo-TPPs (yellow); and fungal hypo-endosedolisins (red). Red dots indicate bootstrap support of over 0.7. Sequences with known characteristics are indicated in larger font and described in the text. The small radial phylogram shows the midpoint rooted tree with distances. The scale bar indicates 1 amino acid substitution per site. (B) The circular phylograms show the clustering of the four CSIs: the length of each sequence's CSI is represented by a red bar. The scale bar at the bottom corresponds with 25 amino acid residues (C) Sequence logos of the CSI2 and CSI4 regions of the hypo-endosedolisin cluster.

### 3.2 Cluster Specific Inserts

The MSA demonstrates the presence of four Cluster Specific Inserts (CSIs) we identified in the Hypo-endosedolisins. Fig. 2B shows the distribution of insert length on the phylogeny thereby demonstrating an intricate clustering pattern. CSI2 has about 25 amino acids and is present in all

Hypo-endosedolisins whereas CSI4 has about 40 amino acids and is found only in the large  
 190 subclade of the Hypo-endosedolisin clade. Both show moderate levels of conservation (Fig. 2C).  
 CSI3 is present in all Hypo-endosedolisins as well as in certain Hypo-TPPs and some non-fungal  
 sedolisins. CSI1 is present in all sedolisins but is longer in the Hypo-endosedolisins. CSIs 1 and 3  
 show no clear conservation.

Because structure determines function we wondered if the CSIs would interfere in the core  
 195 structure of the protein or if they might appear as solvent exposed loops. We created a model of  
 SED\_A and structurally aligned it with 3EE6 (Fig. 3). Overall, the model is very similar to the  
 3EE6 structure and the non-homologous CSIs 1, 3 and 4 are indeed predicted at the surface of the  
 mature protein. CSI2 is largely exposed but forms a partially buried helix as is discussed below.  
 This confirms that the CSIs not necessarily affect the basic functional fold of subtilisin-like  
 200 proteases. Although in the absence of homologous template the prediction of the loop structures  
 formed by the CSIs is not very reliable, the model does allow some general predictions. CSI1 is  
 located next or into the prosegment and likely does not form part of the mature enzyme but rather  
 forms part of the propeptide or linker region (See Fig. 1). CSI2 and CSI4 are located on opposite  
 ends of the predicted binding pocket (Not shown). CSI3 appears near the calcium binding site.

205

**Fig. 3. The Cluster Specific Inserts are Solvent exposed.** Structural alignment of the 3EE6  
 structure, represented in blue cartoon and the SED\_A model represented in pink (prosegment) and  
 green cartoon (core) with the CSI1 to 4 in yellow cartoon. The red and the orange spheres represent  
 the catalytic residues and oxyanion respectively.

210

Fig. 4 shows the conformational differences between 3EE6 and the wild type (WT) models SED\_A  
 and SED\_B as well as a number of mutations that are discussed in the SDP section. An important  
 conformational difference is the additional  $\alpha$ -helix found in the SED\_A model, referred to as H9b,  
 that partially originates from CSI2 (See Fig. 4E). As a result the location of Helix 9 also slightly

differs. This seems to have an effect on the binding pocket (Compare predicted pockets of SED\_B (Fig. 4D) and SED\_A (Fig. 4E). The virtual mutant lacking CSI2 does not show helix 9b and retained a structure similar to 3EE6.

**Fig. 4. Conformational Differences among Wild Type and Mutant Sedolisins.**

(A) Cartoon of the SED\_A model with regions that have a resQ score below 5 Å in grey, homologous regions above 5 Å in yellow and CSIs with resQ above 5 Å in red. (B) ResQ plot of SED\_A Modeling. (C) Schematic representation of the major structural differences in secondary structure elements of the polypeptide between helices 9 and 12 observed in WT and mutant models of SED\_A and SED\_B as compared to the 3EE6 structure. Quadruple refers to the virtual SED\_A A343F-F92L-K407Q-L410S mutant. Yellow diamonds indicate conserved cysteines that are possibly involved in a novel disulfide bridge. Approximate positions of SDPs 307, 340, 343 and 349 are indicated from left to right by a green check mark. Absent counterparts are represented as a red cross. Helices and sheet are in red cylinders and blue arrows. (D) Local detail of the structural alignment of 3EE6 (blue cartoon) with model obtained for WT SED\_B (cyan cartoon). (E) Local detail of the structural alignment of WT SED\_A model (yellow cartoon) and the SED\_A quadruple mutant model (green cartoon). Helix numbers are indicated in the 3EE6 structure.

**3.3 SDP identification**

We used SDPfox[34] to identify CDPs, positions that contribute significantly to the underlying clustering. We identified 25 CDPs between the Hypo-endo and the Hypo-TPP clusters. Then we performed an analysis of mutual information between positions using MISTIC[35]. Mutual information expresses levels of covariation and high levels suggest co-evolution. CDPs might result from genetic drift but CDPs that show high levels of interaction are more likely specificity determining positions (SDPs). Table 1 shows the result of the analysis and shows the numbering of SDPs (according to reference sequence of 3EE6) in SED\_A and SED\_B. We envisaged that the

functional characteristics of phylogenetically well separated subfamilies, such as the Hypo-endo and Hypo-TPP sedolisins, are the result of the interaction of multiple positions. Hence, it is likely that one or possibly more subnetworks of directly connected CDPs exist. These subnetworks, or Specificity Determining Networks (SDNs) of directly connected CDPs would not only substantiate that CDPs are likely SDPs, it would also show which positions have co-evolved towards a certain diversification.

**Table 1: Identification of SDPs**

|     |      |       |       | SDPfox  | MISTIC cMI |       |
|-----|------|-------|-------|---------|------------|-------|
| Net | 3EE6 | SED_A | SED_B | Z-score | Endo       | TPP   |
| -   | S294 | D324  | G312  | 15.5    | 235        | 412   |
| E   | K346 | K407  | Q377  | 13.9    | 284        | 27.7  |
| E   | V340 | Q401  | V371  | 13.8    | 244        | 173   |
| E   | S73  | S76   | H75   | 12.6    | 207        | 6.5   |
| E   | E343 | E404  | L374  | 9.9     | 150        | 14.1  |
| E   | W307 | A343  | F336  | 8.8     | 331        | 7.2   |
| E   | V89  | F92   | L92   | 8.4     | 189        | 19.1  |
| E   | A349 | L410  | S380  | 8.0     | 109        | 36.7  |
| E   | V260 | P280  | F268  | 7.2     | 114        | 25.8  |
| -   | R350 | Q411  | R381  | 11.7    | 156        | 588.6 |
| -   | M345 | M406  | A376  | 11.4    | 124        | 13.5  |
| -   | L61  | G64   | F63   | 11.3    | 126        | 7.1   |
| T   | E302 | N338  | E331  | 10.9    | 219        | 53.4  |
| T   | F304 | F340  | Y333  | 7.3     | 101        | 29.4  |
| T   | Q301 | L337  | N330  | 7.0     | 49         | 29.8  |
| -   | L500 | V586  | M528  | 9.7     | 43         | 51.6  |
| p   | Q55  | Q58   | L55   | 9.7     | 167        | 0     |
| p   | A52  | G55   | L55   | 7.1     | 183        | 13.63 |
| -   | L455 | I542  | Q484  | 9.5     | 123        | 21.7  |
| -   | Q229 | E252  | S241  | 9.1     | 224        | 29.5  |
| -   | V291 | Q321  | S309  | 8.2     | 231        | 7.1   |
| -   | L80  | L83   | F82   | 7.8     | 24         | 41.5  |
| -   | R506 | V592  | W534  | 7.4     | 74         | 20.9  |
| -   | F51  | I54   | L51   | 7.1     | 47         | 0     |
| -   | F235 | Y258  | A247  | 7.1     | 83         | 0     |

Numbers of SDPs are indicated for reference 3EE6 as well as SED\_A and SED\_B sequences. SDPs are sorted according to descending SDPfox score but grouped by connected SDP network: E; endo, T: TPP, p: putative SDPs form endo.

Next we considered how evolution might have occurred. As stated before, we have no insight in the exact functional characteristics of the ancestral protein. This might have been an endo-sedolisin, a TPP or a protease capable of both reactions. On the one hand we must assume the diversification process in one clade has been largely independent from that in another clade. On the other hand we can also envisage that the diversification processes, although strictly independent, might affect the

same positions. As a result, *a priori* one does not know which dataset should be used to determine MI levels. We first performed a global MI analysis comparing the networks obtained when using only the Hypo-endo, the Hypo-TPP and all fungal sequences combined, respectively. Fig. 5 shows that when separate clades are used as dataset, similar networks with partitions in two major clusters are identified. When all fungal sequences are used the MI network partitions into three major clusters, showing little similarity to the partitions of the separate subfamily MI analyses. Hence, it is more likely that the diversification has been the result of independent processes and that as such MI analysis for the identification of SDNs involved in the fungal sedolisin diversification should be determined using clade specific datasets. We identified eight directly connected CDPs using the MI analysis of the Hypo-endo sequences (Fig. 6.). The high level of connection suggests these form an SDN of co-evolving SDPs that would correspond with the subfamily's functional diversification towards and endopeptidase. In addition we identified a pair of connected CDPs that, since we cannot establish connectivity levels, we initially considered as putative SDPs. The Hypo-TPP MI analysis identified a three node SDN that seems unrelated to the Hypo-endosedolisin SDPs, confirming that the diversification processes in both subfamilies are independent and that in this case, as such, for the determination of SDNs it is necessary to use the alignment of each of the studied subfamilies.

### ***Fig. 5. Cluster dependent Mutual Information Networks.***

*Shown are the MI networks obtained for the hypo-endo cluster; the hypo-TPP cluster; and the combined hypo-endo / hypo-TPP cluster containing all fungal sequences. Red nodes represent the same positions in the three MI networks demonstrating high similarity between the Hyp-endo and Hypo-TPP MI networks only.*



## Fig. 6. Specificity Determining Networks.

SDPs, i.e. CDPs with high mutual information determined on the Hypo-Endo and Hypo-TPP subclade datasets form one highly connected Specificity Determining Network each. Sequence logos show residue conservation at the involved positions in the Hypo-Endo, the Hypo-TPP and non-fungal clades.

### 3.4 Structure-Function Prediction

Probably not all SDPs of the identified SDN will have the same impact on enzyme function. The most highly connected SDPs that between clades have residues with a large physicochemical difference, are most likely to explain the functional diversification. Both SDP346 and SDP89, located in the core and the prosegment respectively, connect to five other SDPs (Fig. 6). Core SDP346 shows a substitution of the amphipathic, positively charged Lysine in Hypo-endo (K407 in SED\_A) to most often the polar glutamine in Hypo-TPP (Gln377). In Human TPP 3EE6, K346 is located on the interface between core and prosegment interacting with E343 (Fig. 7A). Although SED\_A has the same residues, K407 (homologous to K346 from 3EE6, see Table 1) physically interacts with SDP89 (F92). This, according to the model, seems to be caused by a slight dislocation of helix 9 in SED\_A, on its turn forced by the additional helix 9b, which results from CSI2. The corresponding Q377 of SED\_B was modeled internally and is likely stabilized in the opposite direction by the polar residue Arg 381 in SED\_B (Fig 7C) whereas F92 is replaced by a Leucine. The hydrophobic interaction between the large F92 and the aliphatic chain of K407 suggests SDP346 is involved in the interaction between prosegment and core. The  $\epsilon$ -amino group of K407, no longer forming a salt bridge with E404 is envisaged to be protonated upon secretion into the acid environment, thereby destabilizing the interaction between core and prosegment regions. Given the suggested role of the prosegment in sedolisin folding and stabilization[15] this could explain at least part of the diversification.

**Fig. 7. Interaction of SDP346, SDP343 and SDP89 at the interface between core and prosegment.**

310 Cartoons showing interaction in 3EE6 (A), SED\_A (B) and SED\_B (C). In 3EE6 K346 forms a salt bridge with E343. The different location of Helix 9 in SED\_A appears to separate K407 and E404 which is compensated by F92 from the prosegment. In the SED\_B model Q377 is folded internally and interacts with R381. Green cartoon corresponds with core where pink cartoon represents prosegment. The SDPs are represented in licorice element, while surf represents their 5Å radius.

315

SDP349 also occurs in the vicinity of SDP346 and connects directly to both SDP346 and SDP89. Alanine, common in Hypo-TPP is slightly less hydrophobic than the predominant Leucine of Hypo-endosedolisins. SDP 340 is also in close range of SDP346 and connects directly to SDP89. It shows predominantly a polar Glutamine in Hypo-Endo and a hydrophobic Valine in Hypo-TPP clade. 320 Interestingly, SDP340 is found next to to position 341 that corresponds with one of two cysteines that are absent in non-fungal sedolisins and strictly conserved in fungal sedolisins (See Figure 1). Since strictly conserved cysteine pairs often correspond with disulfide bridges we checked their orientation in the models of SED\_A and SED\_B. Although in both the SED\_A (S Fig. 1D) and the SED\_B model they are modeled at positions that seem to favor a disulfide bridge, this is not 325 modeled. Nevertheless, the virtual C402A / C452A double mutant of SED\_A also reverts to the structure lacking helix 9b (Fig. 4C). All together, this suggests that the SDN is related to the predicted structural changes discussed in the previous section.

SDP307, part of helix 9, is a position that, according to the MI analysis, interacts with SDPs 346, 349 and 89. Although in the structure of Human TPP 3EE6 W307 is located at over 9 Å from 330 the local SDP network described above, in the model of SED\_A, its counterpart Alanine is found at 3.7 Å (See Fig. 7B). W307 is buried in 3EE6 and present in most other non-fungal sequences and represented by an aromatic residue in the Hypo-TPP clade. Substitution of a buried aromatic residue

by the small Alanine will most likely result in a conformational change. We envisaged that the substitution might be related to the conformational changes identified between 3EE6 and SED\_B on the one hand and SED\_A on the the other. We made structural models of virtual mutants, exchanging SED\_A for SED\_B residues. The model of virtual mutant A307F in SED\_A suggests the loss of helices 9, 9b and 10. Compensation should, according to the above train of thought come from SDPs 89, 346 and 349, which directly connect to SDP307. Hence, we modeled the quadruple A343F-F92L-K407Q-L410S SED\_A mutant. The obtained model resembles 3EE6 and SED\_B since the principal helices H9 and 10 are modeled nearly identically (Fig 4D and E).

The other SDPs show a lower level of connectivity and might involve secondary compensations. SDP 73 connects to key SDP346 as well as to SDP343. SDP 73 is mostly S in the Hypo-Endo and H/N in the Hypo-TPP clade. Structural analysis reveals that this SDP is located in the hinge region preceding the helix that contains SDP89 and following the helix that contains the pair of putative SDPs 55 and 58 that we identified (S Fig. 1). The mentioned pair 55-58 physically interacts with SDP89 and SDP346 suggesting that they might be involved in the same diversification process. SDP73 not only might affect the interaction of SDP89 and SDP 346 but the interaction between prosegment and core in general. Finally, SDP 260 only connects to residue 340 in the SDN and is distant to the local SDP network. The fact that it concerns a proline located at a hinge position in the core, which is important in structural conformation, in Hypo-Endo sedolisins suggests this SDP might be involved in a conformational change. The Hypo-TPP network (SDP301-SDP302-SDP304) shows less pronounced physicochemical differences in residue occupation. Interestingly, it is situated within contact range of the SDP307.

## 4 Discussion

We studied eukaryotic sedolisins by computational analysis of protein sequences. The protein sequences were obtained from a large set of complete proteomes among which many of fungal origin since it has been suggested that acidification is related to expansion of the sedolisin family in

fungi. Therefore, the main attention of this study is directed at the evolutionary history of fungal  
360 sedolisins.

Sequences were aligned by MAFFT's iterative refinement method and the resulting MSA was manually improved in order to correct poorly aligned hallmark residues as well as residues in secondary structure elements. Correction was likely required due to large taxonomic distances and the presence of CSIs which tend to disturb the alignment process. Prior tree reconstruction, the  
365 MSA was subjected to trimming, guided by maintaining particularly  $\beta$ -sheets, in order to remove these CSIs and unreliably aligned subsequences. The clustering pattern of the CSIs largely corresponds with the phylogenetic clustering (See figure 2B), which confirms the topology of the tree is basically correct, as is also indicated by bootstrap support (See figure 2A and B). Interestingly, the tree contains two fungal clades and a clade with other eukaryotic sedolisin  
370 sequences. Since the fungal sequences are clearly separated from the non-fungal eukaryotic sequences it appears the evolutionary rate of fungal sedolisins has been higher than that of other sedolisins. A possible explanation for the accelerated evolutionary rate in fungi is given by the fact that fungal sedolisins are predicted to be secreted, whereas Human TPP is lysosomal. Tree topology combined with the apparent random distribution of fungal paralogs over the two fungal clades  
375 clearly suggests functional diversification. Although additional subclades can be distinguished and certain fungi have up to six paralogs, we focused on comparing the two major fungal clades based on the observation, initially made by Reichard and coworkers[22], that characterized TPPs are found in a different clade than endo-sedolisins (Fig 2). We studied the role of CSIs and SDPs in the context of a conformational change observed in a model of endosedolisin SED\_A, as compared to  
380 Human TPP structure and a model of TPP SED\_B.

The CSIs form a major obstacle when studying diversification of fungal sedolisins. Not only does their presence negatively affect the alignment process, it will also affect folding, making modeling less reliable. The residue quality (resQ) scores provided by I-TASSER are an indication of

the reliability of the model and confirm that the CSI regions are unreliably modeled whereas in  
 385 general confidence of the models is good (e.g. see for model of SED\_A in Fig 4A and B). The fact  
 that the loops are likely incorrectly modeled does however not imply that their approximate location  
 is incorrect and we envisage their solvent exposed location does not severely affect the folding of  
 the core. It is difficult to envisage or explain how CSIs 1, 3 and 4 are related with the hypothesized  
 diversification towards endosedolisins and TPP but the fact that CSI2 seems to instigate a  
 390 conformational change and that removing CSI2 from SED\_A yields a model that resembles the fold  
 of 3EE6 (Fig. 4) is intriguing. Furthermore, CSI2 and CSI4 are conserved among all and most  
 Hypo-endosedolisins respectively (Figure 2B) and are located on opposite sides of the predicted  
 pocket cavity of Hypo-endosedolisins. As such they might affect the exact conformation of the  
 pocket. They also may have some importance in substrate binding or contain retention signals. CSI3  
 395 and CSI1 show no clear conservation and are found near to the calcium binding site and in the  
 prosegment respectively and there are no clues regarding their functions.

A number of approaches and softwares to predict SDPs exist, although it might be noted that  
 most often CDPs are identified. CDPs are most likely the result of positive selection but neutral  
 evolution or even phylogenetic reconstruction artifacts can also result in CDPs. Diverge[45] should  
 400 theoretically contemplate this by using likelihood models. A recent version of evolutionary  
 trace[46] includes mutual information in order to substantiate its predictions. We combined  
 SDPfox[34], to identify CDPs, with MISTIC[35], to confirm CDPs as SDPs. In a recent paper we  
 showed that combination identified a number of known target positions in the evolution of truncated  
 hemoglobins[47], which shows the applicability of the method. The disadvantage of MI is the  
 405 requirement of large datasets, which basically means the MI calculations in this case are not too  
 reliable. However, since MISTIC Z-scores tend to increase with the number of sequences and we  
 used the default threshold, set for about 400 sequences, the MI calculation we made will most likely  
 have suffered poor sensitivity rather than poor specificity. Then we further extrapolated the idea that

CDPs with high MI are likely SDPs towards SDP network connectivity. We identified three  
 410 networks. The largest network contains eight SDPs of which two connect to five out of seven other  
 SDPs and only one has a single SDP MI interaction. A second network identified using the  
 endosedolisin dataset has only two SDPs that we therefore considered as putative SDPs. The third  
 network contains three SDPs and is fully connected. All together, out of the 25 CDPs we selected  
 only 13 SDPs that, as will be described below, appear to be related to a single functional  
 415 diversification, just as we expected based on the tree topology.

The advantage in using SDNs is not only reflected in that it allows for a substantiation of  
 SDP prediction, it also relies in the fact that it shows co-evolving partners allowing a more  
 elaborated explanation and improved predictions and understanding of the complete process of  
 functional diversification. As stated before, based on the tree topology we envisaged a single  
 420 functional diversification towards, based on biochemical evidence, endosedolisin and TPP activity.  
 Although there are many uncertainties since it seems many factors, including SDPs but also at least  
 one of four CSIs, are involved, all results seems to converge around the conformational change  
 identified in the SED\_A model. Models of virtual mutants directed at the central role of SDP307,  
 the compensations of SDPs 89, 346 and 349, the predicted disulfide bridge and also the four CSIs  
 425 suggest all are involved in that conformational change. Then, if we consider the conservation  
 pattern of Trp/Phe/Tyr of SDP307 in the hypo-TPP clade, we should actually consider that position  
 307 is an SDP in the TPP clade. Thus, the evolutionary processes that have taken place in the two  
 clades are strictly independent, they seem to converge at the central role for SDP307.  
 Correspondingly, SDP307 has been shown to be important for activity in Human TPP[14]. Where,  
 430 in the presence of a predicted disulfide bridge C402-C452, A307 requires compensation from SDPs  
 340-346-349 and 89, all together resulting in a conformation that allows endosedolisin activity,  
 W/F/Y307 would require compensation by SDPs 301-302-304 to favor TPP activity. The  
 endosedolisin activity seems not only caused by additional helix 9, coded by CSI2, but is also

related with the interaction with the chaperone-like prosegment, as shown by the apparently  
 435 important interaction between the aliphatic sidechain of K346 and F89, further strengthened by the  
 combination of SDP73 and the pSDP pair of 55 and 58, as demonstrated in S. Fig. 1. Interestingly  
 the putative SDP pair we identified also points to this interaction and more easily explains the role  
 SDP73 might play.

Another consideration that can be made is how evolution has most likely occurred. Although  
 440 we did not perform a prediction of the ancestral fungal sequence, a number of observations should  
 be made. We envisage the absence of the disulfide bridge C402-C452 in the SED\_A model as a  
 modeling artifact. The fact that two Cysteines are modeled within 5 Å distance combined with the  
 fact that they are strictly conserved among fungal sedolisins, is not likely a mere coincidence. It can  
 be envisaged that such a disulfide bridge stabilizes the enzyme in the oxidative extracellular  
 445 environment and that the invoked structural change triggered compensations which we hypothesize  
 have resulted in the diversification towards TPP and endosedolisin activity. This predicted bridge  
 appears to be required for the conformational change near the binding pocket as is shown by the  
 virtual mutant (Fig 4C). However, the presence of the disulfide bond in SED\_B does not affect the  
 conformation, suggesting its presence is not sufficient for the conformational change in SED\_A. An  
 450 obvious requirement is the presence of at least part of CSI2. Interestingly CSI2 is the only CSI that  
 corresponds perfectly with the clustering into Hypo-endo and Hypo-TPP. The ancestral SDP307  
 was likely a Tryptophan but the other SDPs that show significant physiochemical changes seems to  
 correspond with endosedolisins (S73, E343, K346 in 3EE6 and SED\_A).

Although SDPs, mutant analysis and literature confirm each other, future validation of the  
 455 proposed functional differences requires molecular dynamics and or wetlab experiments. Given the  
 sheer amount of characteristics (i.e. CSIs and SDPs) involved, this will be difficult to achieve. As  
 such, maybe the first approach is to obtain a structure of SED\_A or another characterized  
 endosedolisin such as Aorsin.

The remaining question concerns how this change in conformation is related to the  
 460 difference in activity. TPP activity can be envisaged to require a less spacious binding cleft, as can  
 be seen by comparing Fig. 4D and E, in concordance with the fact that SDP307 is occupied by a  
 large hydrophobic residue in the Hypo-TPP and NF clades and by small hydrophobic in Hypo-  
 Endo.

465

### Legends Supplemental Figure

**S. Fig. 1.** A, B and C (3EE6, SED\_A and SED\_B respectively: Interaction between pSDPs 55 and  
 58 and the major SDN via SDP73, affecting the interaction between prosegment and catalytic  
 domain. D Modeling of Cysteines 402 and 452 from SED\_A, strictly conserved among all fungal  
 470 sedolisins and absent in non-fungal sedolisins.

### Citations

- [1] M.H. Cardone, N. Roy, H.R. Stennicke, G.S. Salvesen, T.F. Franke, E. Stanbridge, S. Frisch, J.C. Reed, Regulation of Cell Death Protease Caspase-9 by Phosphorylation, *Science* (80-. ), 282 (1998).  
 475
- [2] B.M. Dunn, Dunn, B. M., Overview of Pepsin-like Aspartic Peptidases, in: *Curr. Protoc. Protein Sci.*, John Wiley & Sons, Inc., Hoboken, NJ, USA, 2001: p. 21.3.1-21.3.6.
- [3] A.A. Rascón, J.H. McKerrow, Synthetic and natural protease inhibitors provide insights into parasite development, virulence and pathogenesis, *Curr. Med. Chem.*, 20 (2013) 3078–102.
- 480 [4] N.D. Rawlings, D.P. Tolle, A.J. Barrett, Evolutionary families of peptidase inhibitors, *Biochem. J.*, 378 (2004) 705–16.
- [5] N.D. Rawlings, A.J. Barrett, MEROPS: the peptidase database, *Nucleic Acids Res.*, 28 (2000) 323–5.
- [6] M. Ottesen, I. Svendsen, [11] The subtilisins, in: 1970: pp. 199–215.
- 485 [7] K. Oda, New families of carboxyl peptidases: serine-carboxyl peptidases and glutamic peptidases, *J. Biochem.*, 151 (2012) 13–25.
- [8] H. Oyama, S. Abe, S. Ushiyama, S. Takahashi, K. Oda, Identification of catalytic residues of pepstatin-insensitive carboxyl proteinases from prokaryotes by site-directed mutagenesis, *J. Biol. Chem.*, 274 (1999) 27815–22.



- 490 [9] A. Wlodawer, M. Li, Z. Dauter, A. Gustchina, K. Uchida, H. Oyama, B.M. Dunn, K. Oda, No Title, *Nat. Struct. Biol.*, 8 (2001) 442–446.
- [10] A. Wlodawer, M. Li, A. Gustchina, H. Oyama, B.M. Dunn, K. Oda, Structural and enzymatic properties of the sedolisin family of serine-carboxyl peptidases, *Acta Biochim. Pol.*, 50 (2003) 81–102.
- 495 [11] W. Ju, R. Zhong, S. Moore, D. Moroziewicz, J.R. Currie, P. Parfrey, W.T. Brown, N. Zhong, Identification of novel CLN2 mutations shows Canadian specific NCL2 alleles, *J. Med. Genet.*, 39 (2002) 822–5.
- [12] M. Walus, E. Kida, K.E. Wisniewski, A.A. Golabek, Ser475, Glu272, Asp276, Asp327, and Asp360 are involved in catalytic activity of human tripeptidyl-peptidase I, *FEBS Lett.*, 579 (2005) 1383–1388.
- 500 [13] R. Steinfeld, H.-B. Steinke, D. Isbrandt, A. Kohlschütter, J. Gärtner, Mutations in classical late infantile neuronal ceroid lipofuscinosis disrupt transport of tripeptidyl-peptidase I to lysosomes, *Hum. Mol. Genet.*, 13 (2004) 2483–2491.
- [14] S. Kuizon, K. DiMaiuta, M. Walus, E.C. Jenkins, M. Kuizon, E. Kida, A.A. Golabek, D.O. Espinoza, R.K. Pullarkat, M.A. Junaid, A Critical Tryptophan and Ca<sup>2+</sup> in Activation and Catalysis of TPPI, the Enzyme Deficient in Classic Late-Infantile Neuronal Ceroid Lipofuscinosis, *PLoS One*, 5 (2010) e11929.
- 505 [15] A.A. Golabek, N. Dolzhanskaya, M. Walus, K.E. Wisniewski, E. Kida, Prosegment of Tripeptidyl Peptidase I Is a Potent, Slow-binding Inhibitor of Its Cognate Enzyme, *J. Biol. Chem.*, 283 (2008) 16497–16504.
- 510 [16] T. Gallagher, G. Gilliland, L. Wang, P. Bryan, The prosegment–subtilisin BPN' complex: crystal structure of a specific “foldase,” *Structure*, 3 (1995) 907–914.
- [17] A.R. Khan, M.N.G. James, Molecular mechanisms for the conversion of zymogens to active proteolytic enzymes, *Protein Sci.*, 7 (2008) 815–836.
- 515 [18] A. Pal, R. Kraetzner, T. Gruene, M. Grapp, K. Schreiber, M. Grønborg, H. Urlaub, S. Becker, A.R. Asif, J. Gärtner, G.M. Sheldrick, R. Steinfeld, Structure of tripeptidyl-peptidase I provides insight into the molecular basis of late infantile neuronal ceroid lipofuscinosis, *J. Biol. Chem.*, 284 (2009) 3976–84.
- [19] J.J. Espino, G. Gutiérrez-Sánchez, N. Brito, P. Shah, R. Orlando, C. González, The Botrytis cinerea early secretome, *Proteomics*, 10 (2010) 3020–34.
- 520 [20] K. TAKAHASHI, K. ODA, Structural Evidence That Scytalidolisin (Formerly Scytalidopepsin A) Is a Serine-Carboxyl Peptidase of the Sedolisin Family, *Biosci. Biotechnol. Biochem.*, 72 (2008) 2239–2242.
- [21] N. Suzuki, K. Nishibori, Y. Oodaira, S.-I. Kitamura, K. Michigami, K. Nagata, Y. Tatara, B.R. Lee, E. Ichishima, Grifolisin, a member of the sedolisin family produced by the fungus *Grifola frondosa*, *Phytochemistry*, 66 (2005) 983–90.
- 525

- [22] U. Reichard, B. Léchenne, A.R. Asif, F. Streit, E. Grouzmann, O. Jousson, M. Monod, Sedolisins, a new class of secreted proteases from *Aspergillus fumigatus* with endoprotease or tripeptidyl-peptidase activity at acidic pHs, *Appl. Environ. Microbiol.*, 72 (2006) 1739–48.
- 530 [23] J. Amselem, C.A. Cuomo, J.A.L. van Kan, M. Viaud, E.P. Benito, A. Couloux, P.M. Coutinho, R.P. de Vries, P.S. Dyer, S. Fillinger, E. Fournier, L. Gout, M. Hahn, L. Kohn, N. Lapalu, K.M. Plummer, J.M. Pradier, E. Quivillon, A. Sharon, A. Simon, et al., Genomic analysis of the necrotrophic fungal pathogens *sclerotinia sclerotiorum* and *botrytis cinerea*, *PLoS Genet.*, 7 (2011) e1002230.
- 535 [24] S.R. EDDY, A NEW GENERATION OF HOMOLOGY SEARCH TOOLS BASED ON PROBABILISTIC INFERENCE, in: *Genome Informatics 2009*, PUBLISHED BY IMPERIAL COLLEGE PRESS AND DISTRIBUTED BY WORLD SCIENTIFIC PUBLISHING CO., 2009: pp. 205–211.
- 540 [25] N.D. Rawlings, F.R. Morton, The MEROPS batch BLAST: A tool to detect peptidases and their non-peptidase homologues in a genome, *Biochimie*, 90 (2008) 243–259.
- [26] K. Katoh, D.M. Standley, MAFFT Multiple Sequence Alignment Software Version 7: Improvements in Performance and Usability, *Mol. Biol. Evol.*, 30 (2013) 772–780.
- [27] X. Robert, P. Gouet, Deciphering key features in protein structures with the new ENDscript server, *Nucleic Acids Res.*, 42 (2014) W320–W324.
- 545 [28] P. Gouet, X. Robert, E. Courcelle, ESPript/ENDscript: Extracting and rendering sequence and 3D information from atomic structures of proteins, *Nucleic Acids Res.*, 31 (2003) 3320–3.
- [29] A. Criscuolo, S. Gribaldo, BMGE (Block Mapping and Gathering with Entropy): a new software for selection of phylogenetic informative regions from multiple sequence alignments, *BMC Evol. Biol.*, 10 (2010) 210.
- 550 [30] S. Guindon, J.-F. Dufayard, V. Lefort, M. Anisimova, W. Hordijk, O. Gascuel, New Algorithms and Methods to Estimate Maximum-Likelihood Phylogenies: Assessing the Performance of PhyML 3.0, *Syst. Biol.*, 59 (2010) 307–321.
- [31] F. Abascal, R. Zardoya, D. Posada, ProtTest: selection of best-fit models of protein evolution, *Bioinformatics*, 21 (2005) 2104–2105.
- 555 [32] D.H. Huson, C. Scornavacca, Dendroscope 3: An interactive tool for rooted phylogenetic trees and networks, *Syst. Biol.*, 61 (2012) 1061–1067.
- [33] I. Letunic, P. Bork, Interactive Tree Of Life (iTOL): an online tool for phylogenetic tree display and annotation, *Bioinformatics*, 23 (2007) 127–128.
- 560 [34] P. V Mazin, M.S. Gelfand, A.A. Mironov, A.B. Rakhmaninova, A.R. Rubinov, R.B. Russell, O. V Kalinina, An automated stochastic approach to the identification of the protein specificity determinants and functional subfamilies, *Algorithms Mol. Biol.*, 5 (2010) 29.

- [35] F.L. Simonetti, E. Teppa, A. Chernomoretz, M. Nielsen, C. Marino Buslje, MISTIC: Mutual information server to infer coevolution, *Nucleic Acids Res.*, 41 (2013) W8-14.
- 565 [36] P. Shannon, A. Markiel, O. Ozier, N.S. Baliga, J.T. Wang, D. Ramage, N. Amin, B. Schwikowski, T. Ideker, Cytoscape: A Software Environment for Integrated Models of Biomolecular Interaction Networks, *Genome Res.*, 13 (2003) 2498–2504.
- [37] G.E. Crooks, G. Hon, J.-M. Chandonia, S.E. Brenner, WebLogo: A Sequence Logo Generator, *Genome Res.*, 14 (2004) 1188–1190.
- 570 [38] H.M. Berman, J. Westbrook, Z. Feng, G. Gilliland, T.N. Bhat, H. Weissig, I.N. Shindyalov, P.E. Bourne, The Protein Data Bank, *Nucleic Acids Res.*, 28 (2000) 235–42.
- [39] J. Yang, R. Yan, A. Roy, D. Xu, J. Poisson, Y. Zhang, The I-TASSER Suite: protein structure and function prediction, *Nat. Methods*, 12 (2014) 7–8.
- 575 [40] J. Yang, A. Roy, Y. Zhang, Protein-ligand binding site recognition using complementary binding-specific substructure comparison and sequence profile alignment, *Bioinformatics*, 29 (2013) 2588–95.
- [41] R.B. Russell, G.J. Barton, Multiple protein sequence alignment from tertiary structure comparison: Assignment of global and residue confidence levels, *Proteins Struct. Funct. Genet.*, 14 (1992) 309–323.
- 580 [42] V. Le Guilloux, P. Schmidtke, P. Tuffery, Fpocket: An open source platform for ligand pocket detection, *BMC Bioinformatics*, 10 (2009) 168.
- [43] B.R. Lee, M. Furukawa, K. Yamashita, Y. Kanasugi, C. Kawabata, K. Hirano, K. Ando, E. Ichishima, Aorsin, a novel serine proteinase with trypsin-like specificity at acidic pH, *Biochem. J.*, 371 (2003) 541–8.
- 585 [44] J. Ezaki, M. Takeda-Ezaki, E. Kominami, Tripeptidyl peptidase I, the late infantile neuronal ceroid lipofuscinosis gene product, initiates the lysosomal degradation of subunit c of ATP synthase, *J. Biochem.*, 128 (2000) 509–16.
- [45] X. Gu, Y. Zou, Z. Su, W. Huang, Z. Zhou, Z. Arendsee, Y. Zeng, An Update of DIVERGE Software for Functional Divergence Analysis of Protein Family, *Mol. Biol. Evol.*, 30 (2013) 1713–1719.
- 590 [46] Y.-M. Sung, A.D. Wilkins, G.J. Rodriguez, T.G. Wensel, O. Lichtarge, Intramolecular allosteric communication in dopamine D2 receptor revealed by evolutionary amino acid covariation, *Proc. Natl. Acad. Sci. U. S. A.*, 113 (2016) 3539–44.
- [47] J.P. Bustamante, L. Radusky, L. Boechi, D.A. Estrin, A. ten Have, M.A. Martí, Evolutionary and Functional Relationships in the Truncated Hemoglobin Family, *PLoS Comput. Biol.*, 12 (2016) e1004701.
- 595

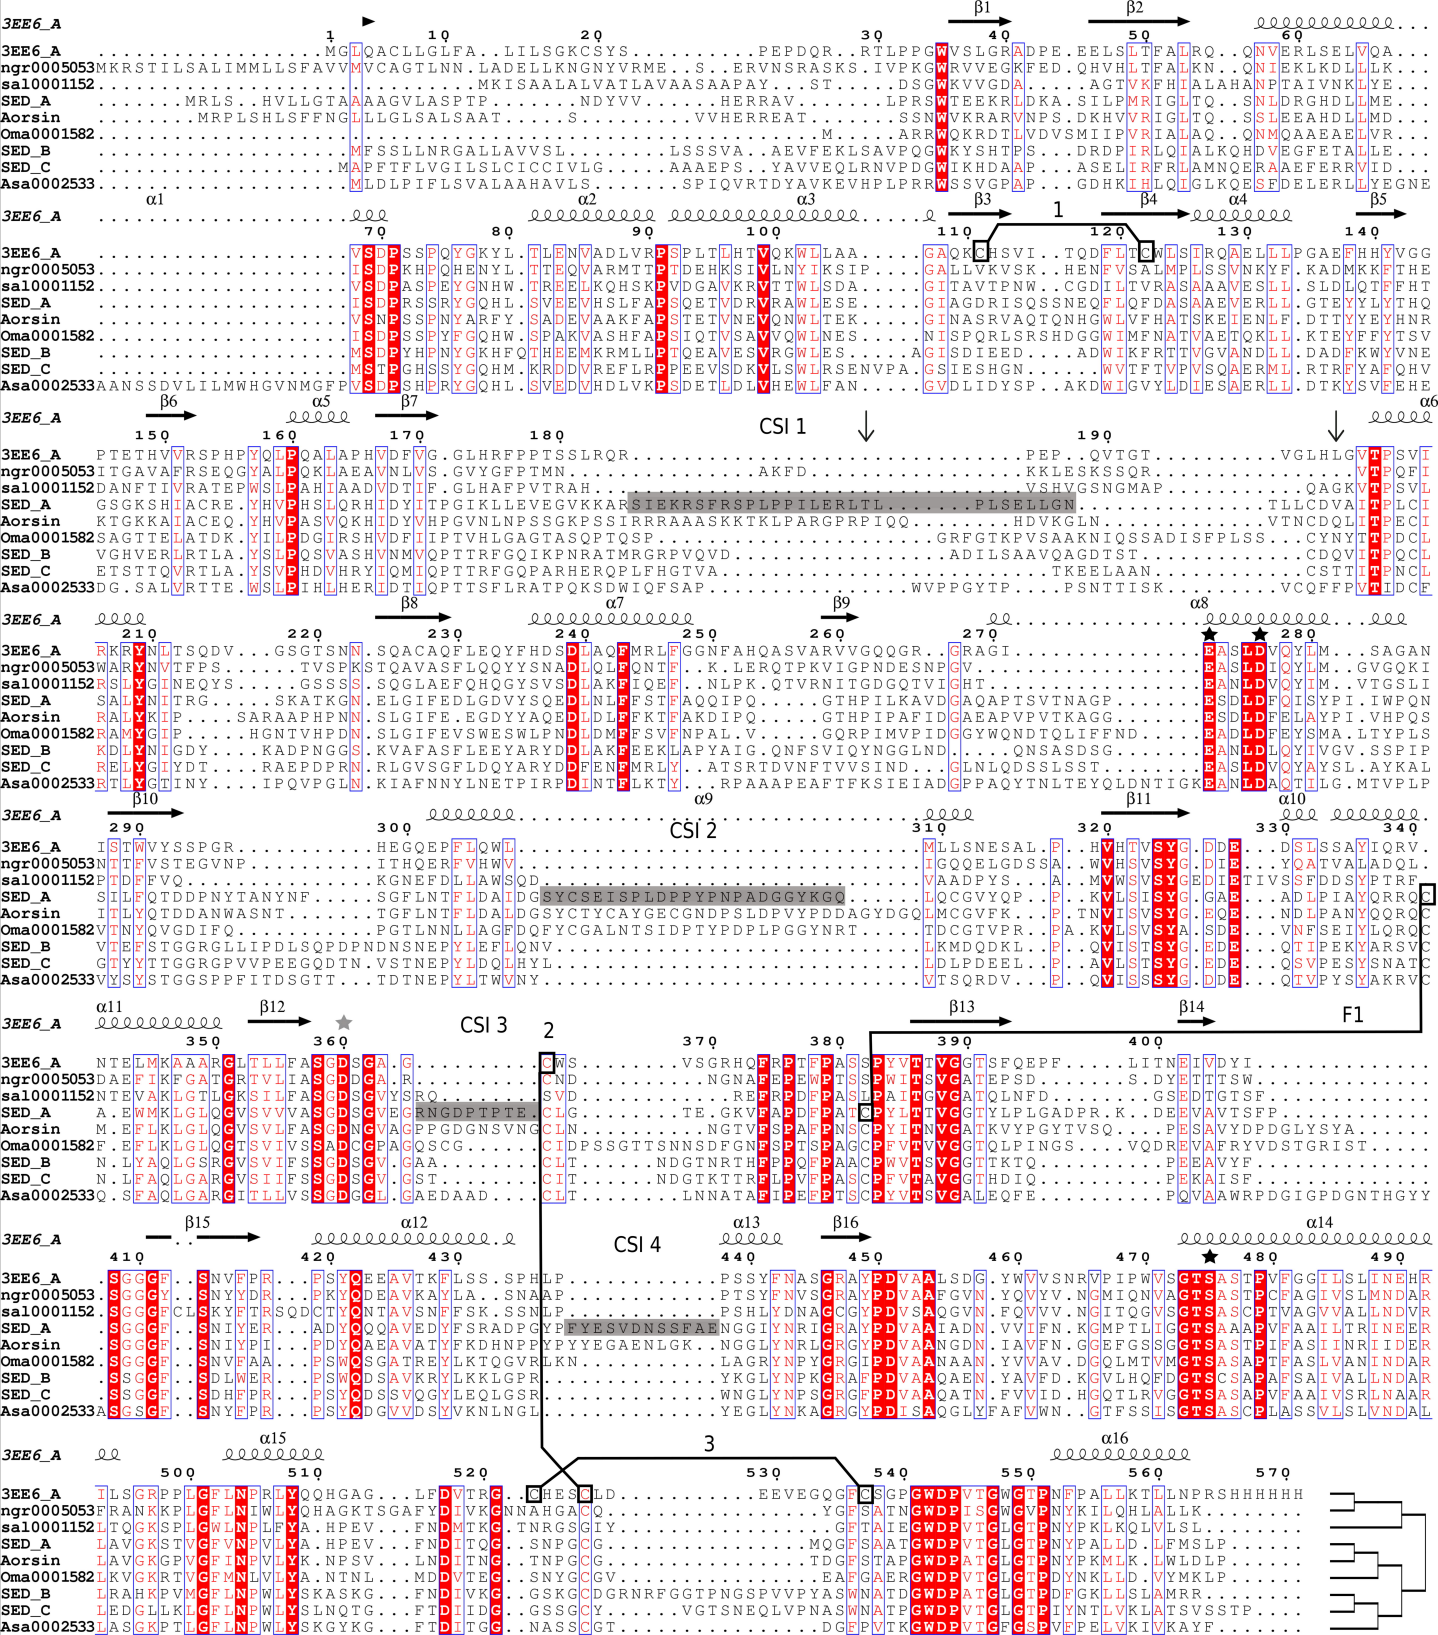





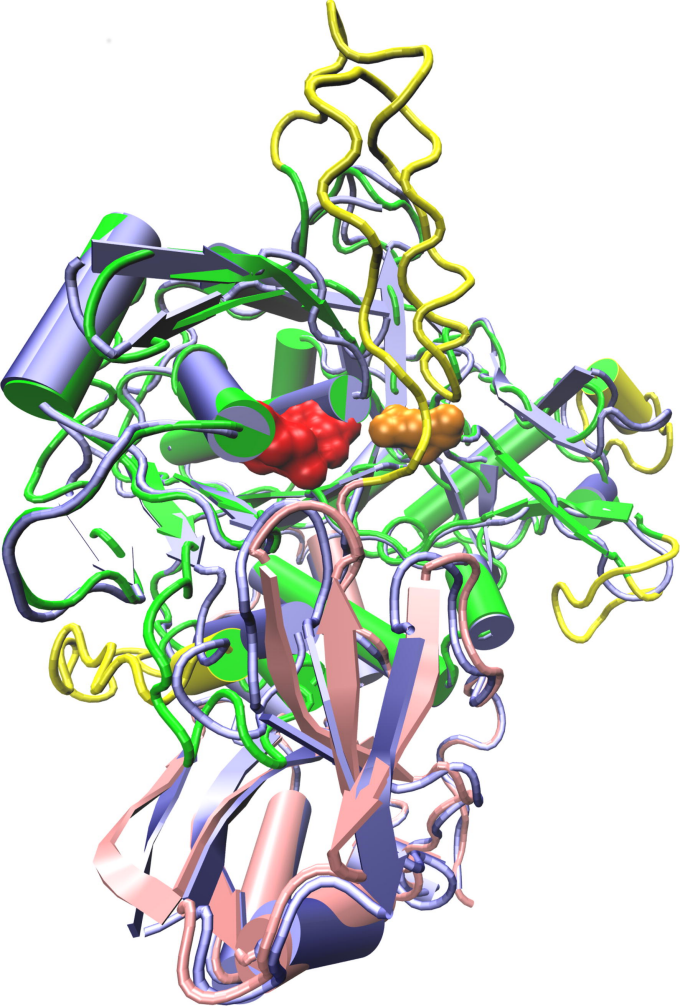

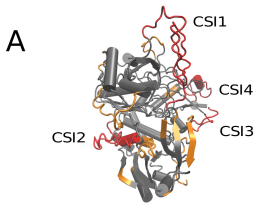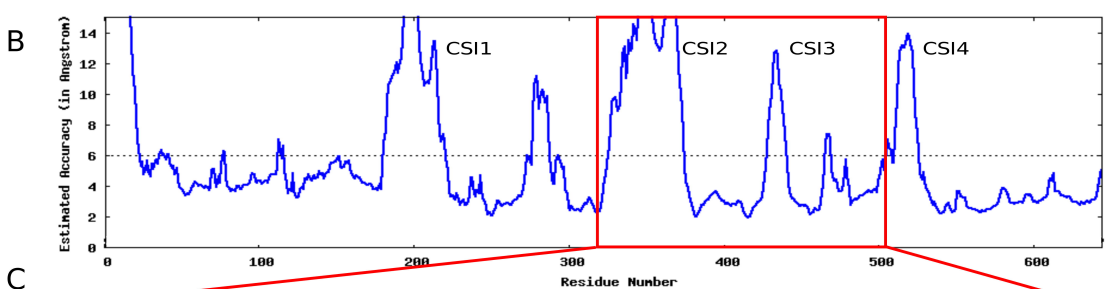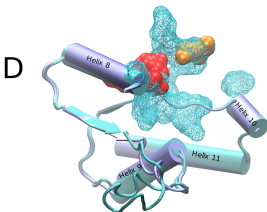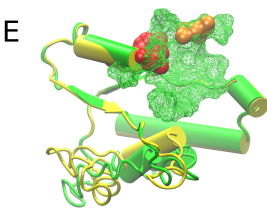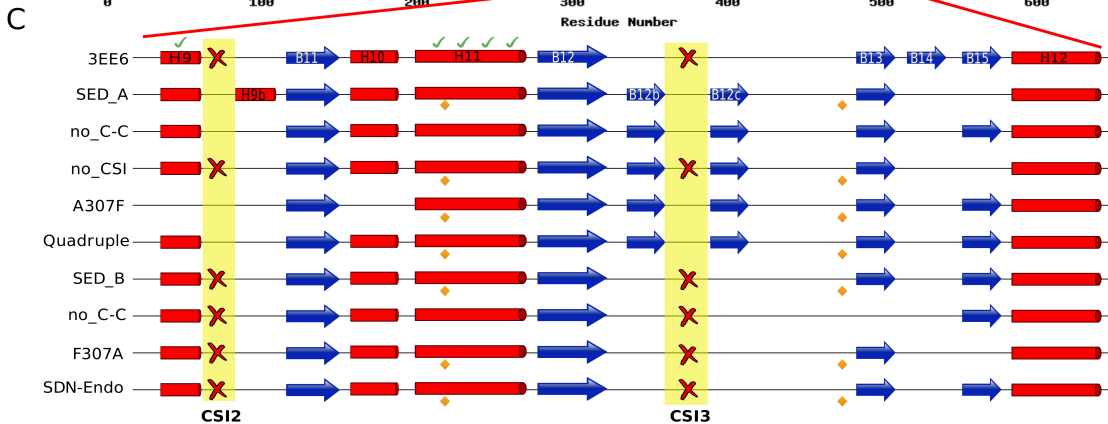

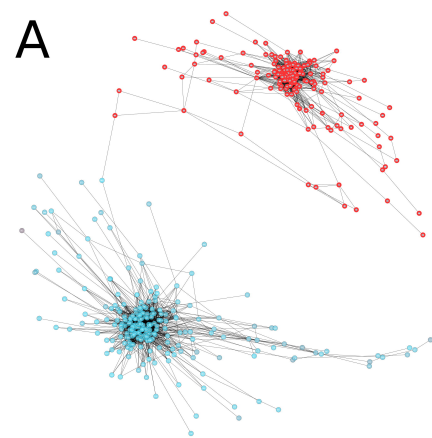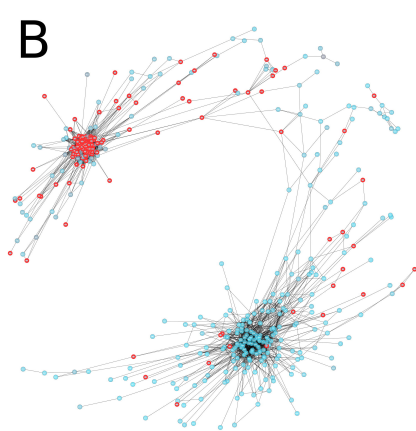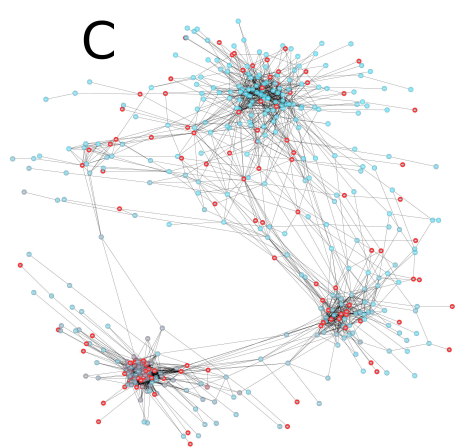



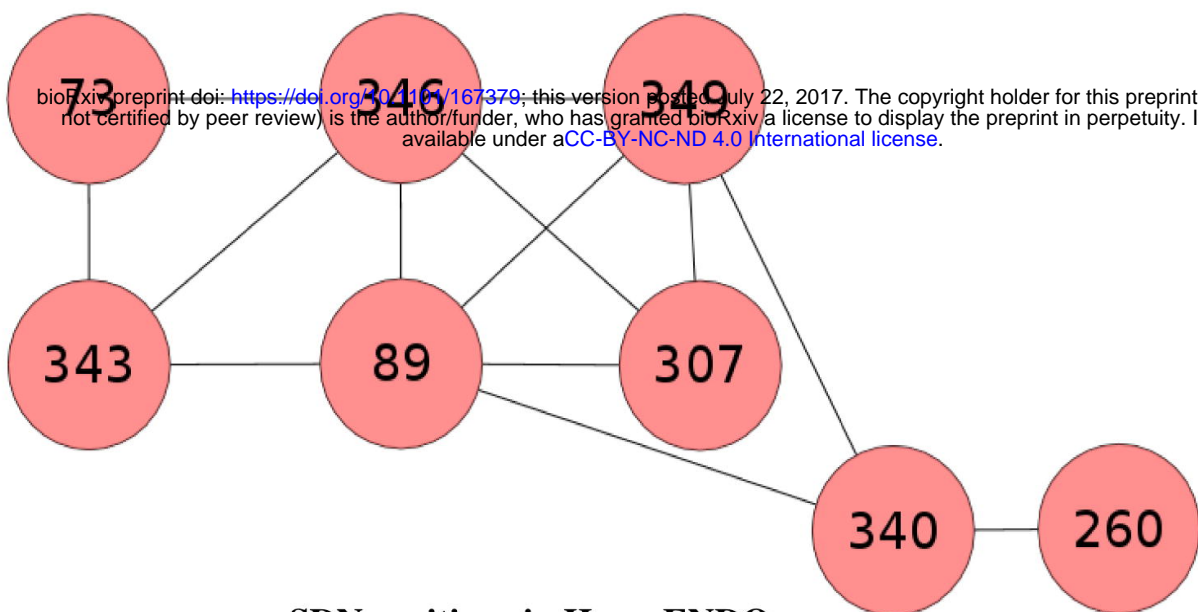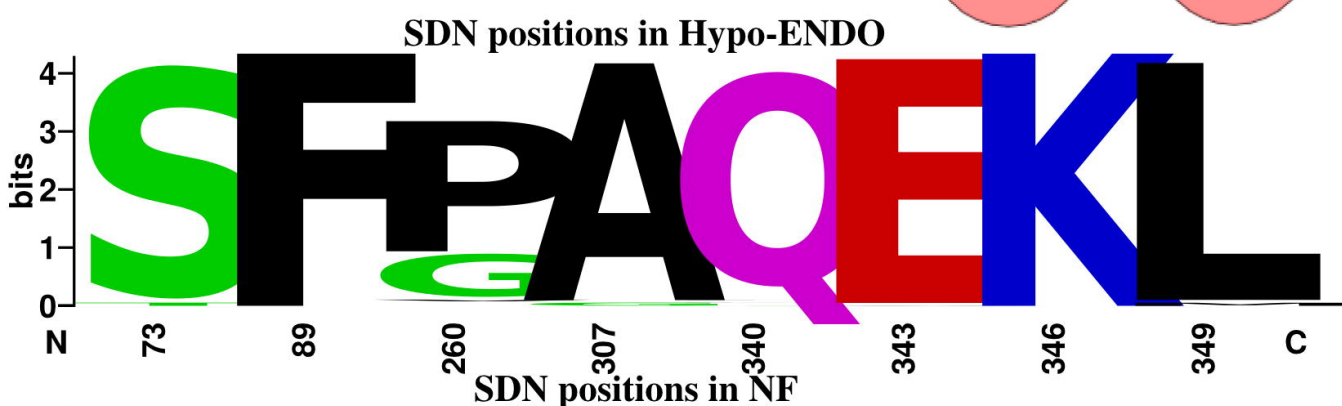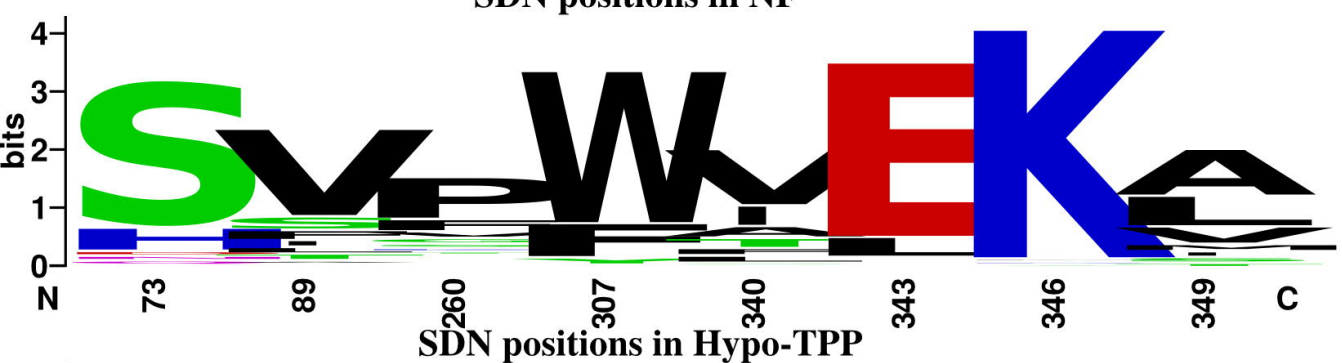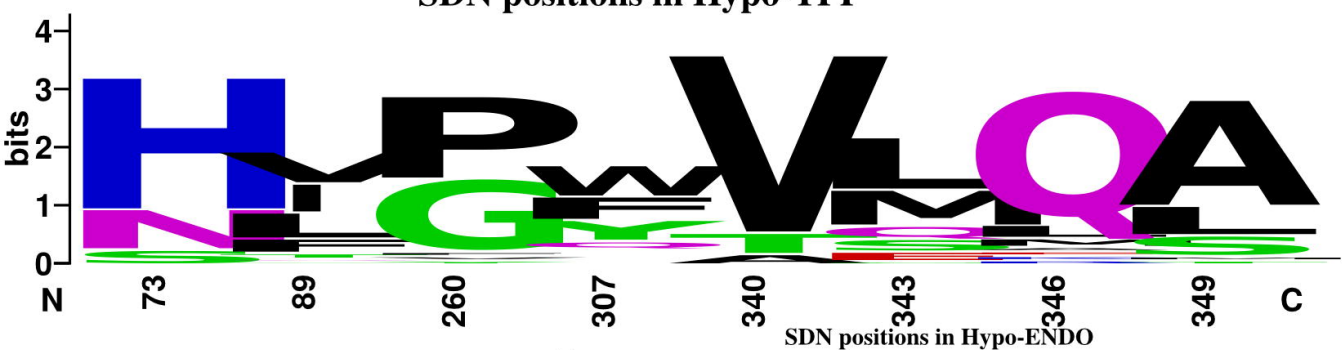

SDN positions in Hypo-ENDO

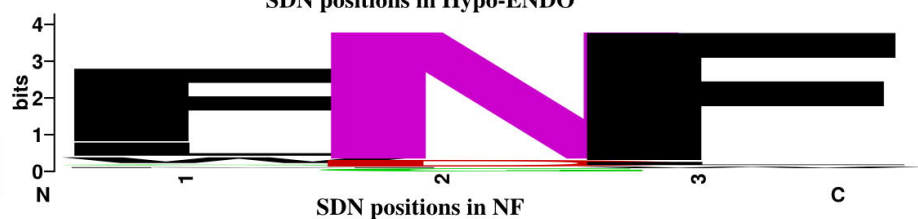

SDN positions in NF

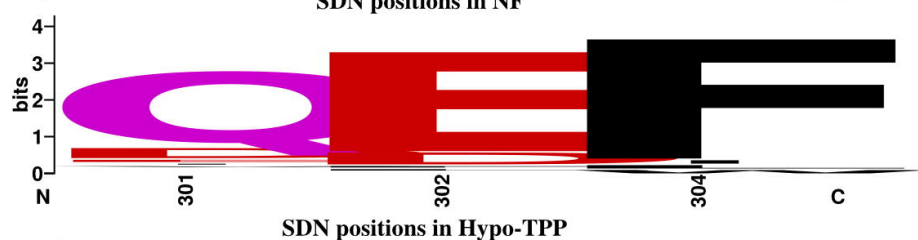

SDN positions in Hypo-TPP

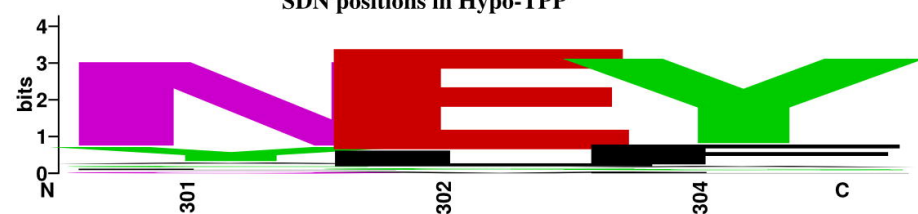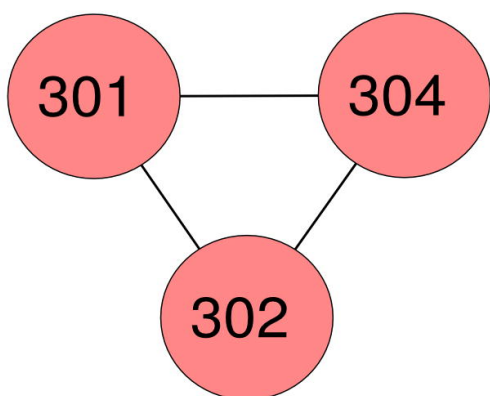

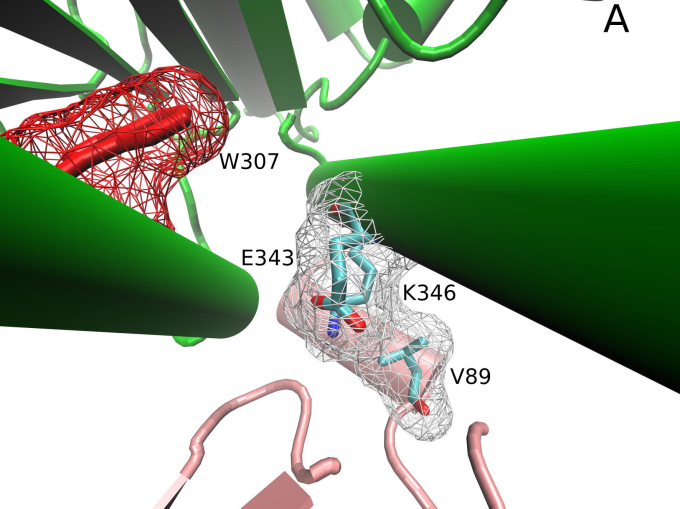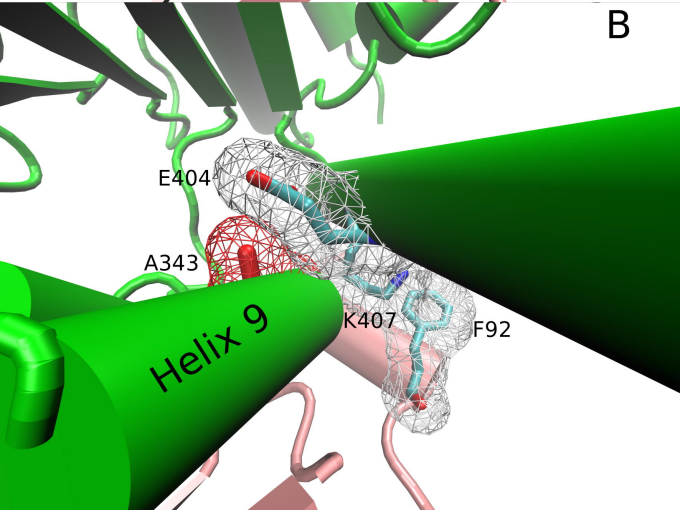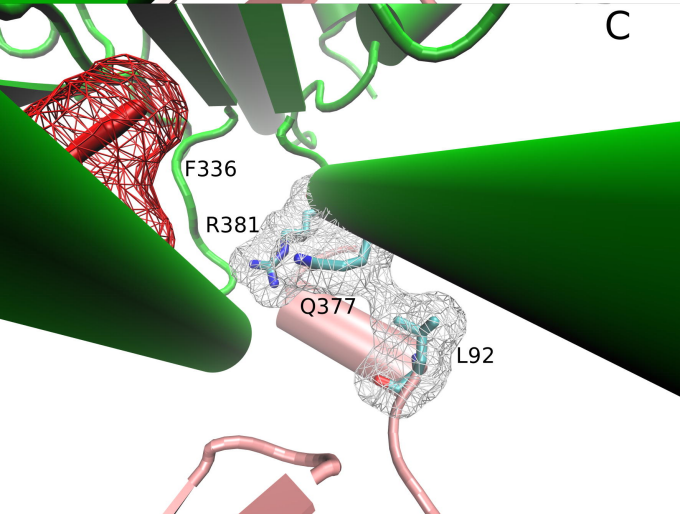

Source: http://www.biorxiv.org/content/10.1101/167379v1.full.pdf
